# Supplementary material for: Biocompatible metallosurfactant-based nanocolloid-loaded Rose Bengal with excellent singlet oxygen-induced phototoxicity efficiency against cancer cells
Source: Royal Society of Chemistry journal article supplement (doi:10.1039/d2tb02730e), 2023-01-01
Supplement: d2tb02730e1.pdf [file d2tb02730e1.pdf]

*Supplementary Information*

**Biocompatible metallosurfactant-based nano-colloids loaded Rose Bengal with excellent singlet oxygen-induced phototoxicity efficiency against cancer cells**

Bunty Sharma<sup>1,2</sup>, Akhil Jain<sup>3</sup>, Frankie J. Rawson<sup>3</sup>, Ganga Ram Chaudhary<sup>1\*</sup>, Lluïsa Pérez-García<sup>2,4,5\*</sup> and Gurpreet Kaur<sup>1\*</sup>

<sup>1</sup> Department of Chemistry, Centre for Advanced Studies in Chemistry, Panjab University, Chandigarh-160014, India

<sup>2</sup> Division of Advanced Materials and Healthcare Technologies, School of Pharmacy, University of Nottingham, Nottingham NG7 2RD, UK

<sup>3</sup> Division of Regenerative Medicine and Cellular Therapies, School of Pharmacy, University of Nottingham, Nottingham NG7 2RD, UK

<sup>4</sup> Departament de Farmacologia, Toxicologia i Química Terapèutica, Facultat de Farmàcia i Ciències de l'Alimentació, Avda. Joan XXIII 27-31, Universitat de Barcelona, 08028 Barcelona, Spain

<sup>5</sup> Institut de Nanociència i Nanotecnologia UB (IN2UB), Universitat de Barcelona 08028 Barcelona, Spain

\*corresponding authors: Gurpreet Kaur (email: [gurpreet14@pu.ac.in](mailto:gurpreet14@pu.ac.in))

Lluïsa Perez-Garcia (email: [mlperez@ub.edu](mailto:mlperez@ub.edu))

Ganga Ram Chaudhary (email: [grc22@pu.ac.in](mailto:grc22@pu.ac.in))

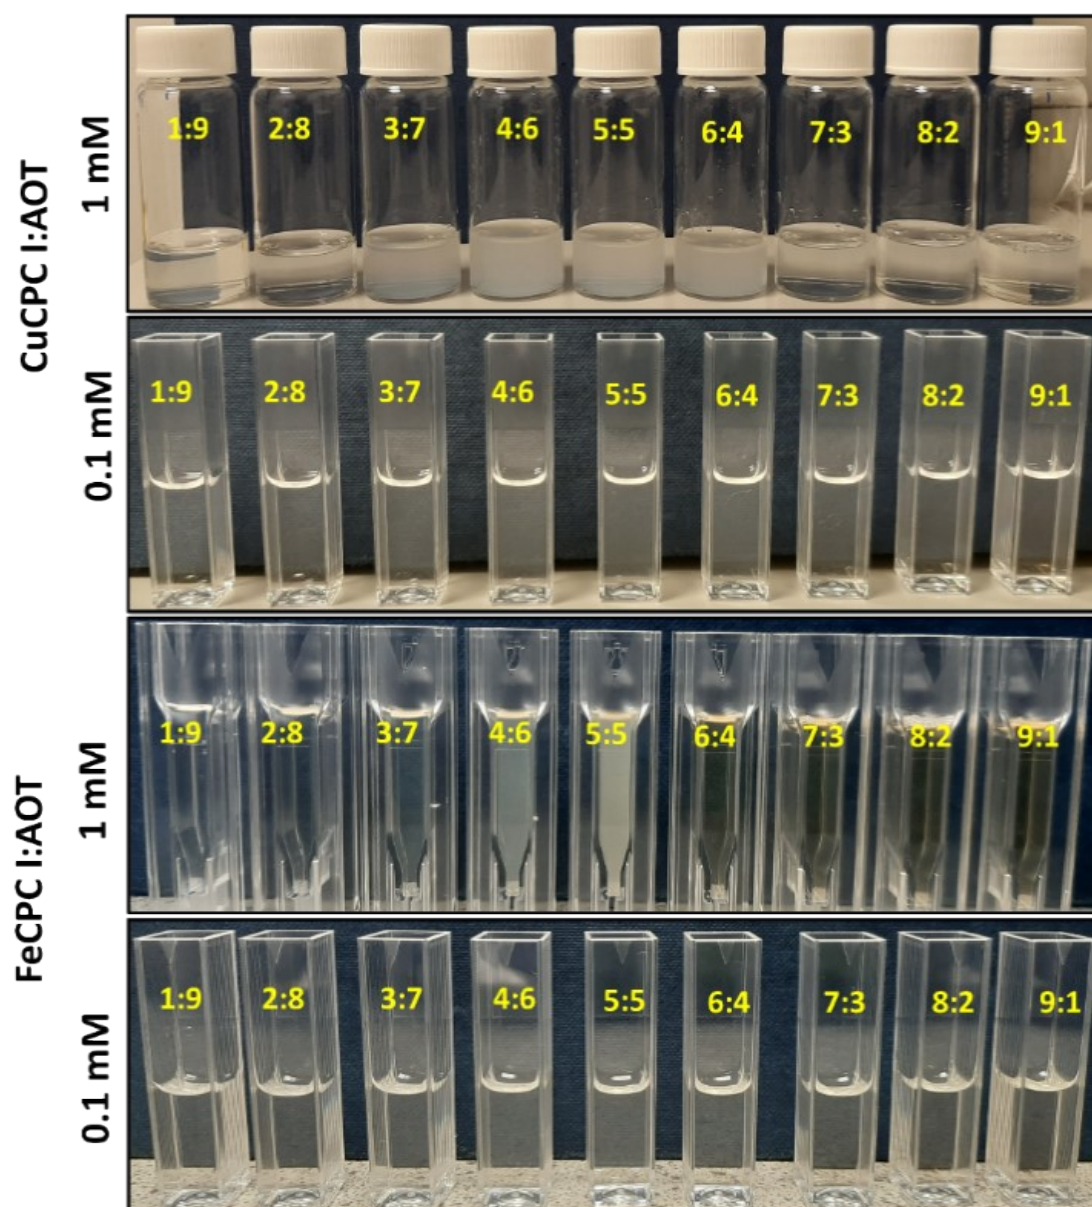

**Fig. S1.** Picture of the prepared fractions of CuCPC I:AOT and FeCPC I:AOT MCVs at 1 and 0.1 mM total concentrations calculated by DLS

**Table S1.** PDI values of the CuCPC I:AOT and FeCPC I:AOT fractions at 1 mM and 0.1 mM total concentration

| Fractions  | CuCPC I:AOT |        | FeCPC I:AOT |        |
|------------|-------------|--------|-------------|--------|
|            | 1 mM        | 0.1 mM | 1 mM        | 0.1 mM |
| <b>1:9</b> | 0.109       | 0.078  | 0.165       | 0.156  |
| <b>2:8</b> | 0.731       | 0.084  | 0.120       | 0.175  |
| <b>3:7</b> | 0.155       | 0.074  | 0.098       | 0.122  |
| <b>4:6</b> | 0.242       | 0.072  | 0.152       | 0.284  |
| <b>5:5</b> | 0.224       | 0.124  | 0.246       | 0.199  |
| <b>6:4</b> | 0.258       | 0.112  | 0.510       | 0.140  |
| <b>7:3</b> | 0.553       | 0.137  | 0.288       | 0.225  |
| <b>8:2</b> | 0.446       | 0.165  | 0.280       | 0.327  |
| <b>9:1</b> | 0.321       | 0.284  | 0.282       | 0.349  |

**Table S2.** Stability of the selected samples of CuCPC I:AOT and FeCPC I:AOT fractions till 1 month estimated by DLS

| Time                       | CuCPC I:AOT |      |           |      | FeCPC I:AOT |      |           |      |
|----------------------------|-------------|------|-----------|------|-------------|------|-----------|------|
|                            | (3:7)       |      | (7:3)     |      | (3:7)       |      | (7:3)     |      |
|                            | size (nm)   | PDI  | size (nm) | PDI  | size (nm)   | PDI  | size (nm) | PDI  |
| <b>Fresh sample</b>        | 122.30      | 0.07 | 125.50    | 0.11 | 267.13      | 0.39 | 134.60    | 0.19 |
| <b>1<sup>st</sup> Week</b> | 236.60      | 0.45 | 235.00    | 0.58 | 234.83      | 0.43 | 276.60    | 0.31 |
| <b>2<sup>nd</sup> Week</b> | 314.10      | 0.47 | 232.20    | 0.53 | 270.46      | 0.43 | 467.26    | 0.38 |
| <b>1 month</b>             | 309.10      | 0.15 | 135.10    | 0.53 | 287.23      | 0.33 | 331.30    | 0.43 |

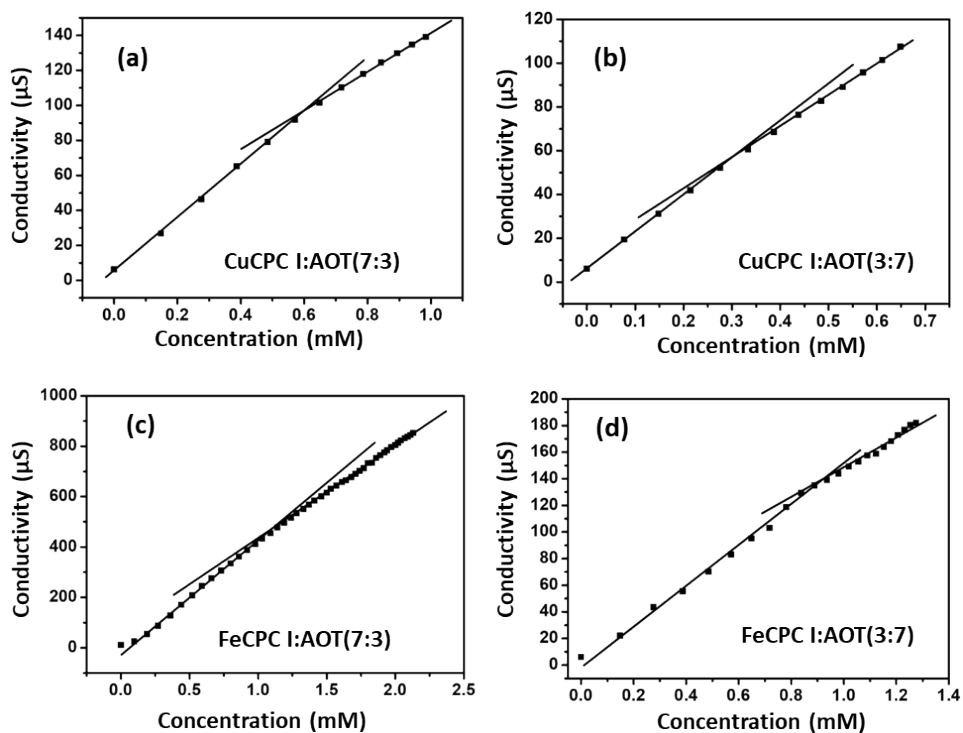

**Figure S2.** Concentration vs Conductivity graphs of (a) CuCPC I:AOT(7:3), (b) CuCPC I:AOT(3:7) fractions; (c) FeCPC I:AOT(7:3) and (d) FeCPC I:AOT(3:7) fractions.

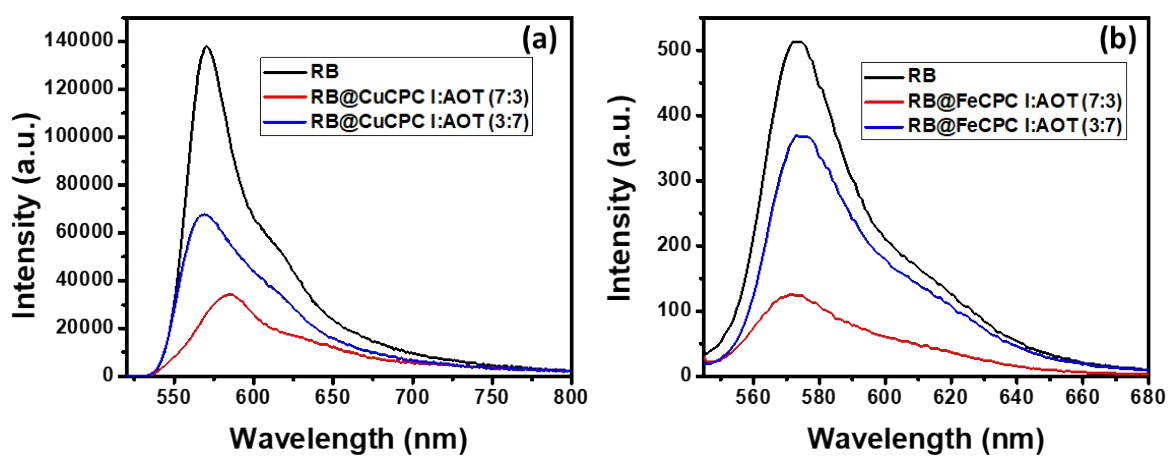

**Figure S3.** RB fluorescence intensity change in presence of (a) CuCPC I:AOT 7:3 and 3:7 fractions; (b) FeCPC I:AOT 7:3 and 3:7 fractions.

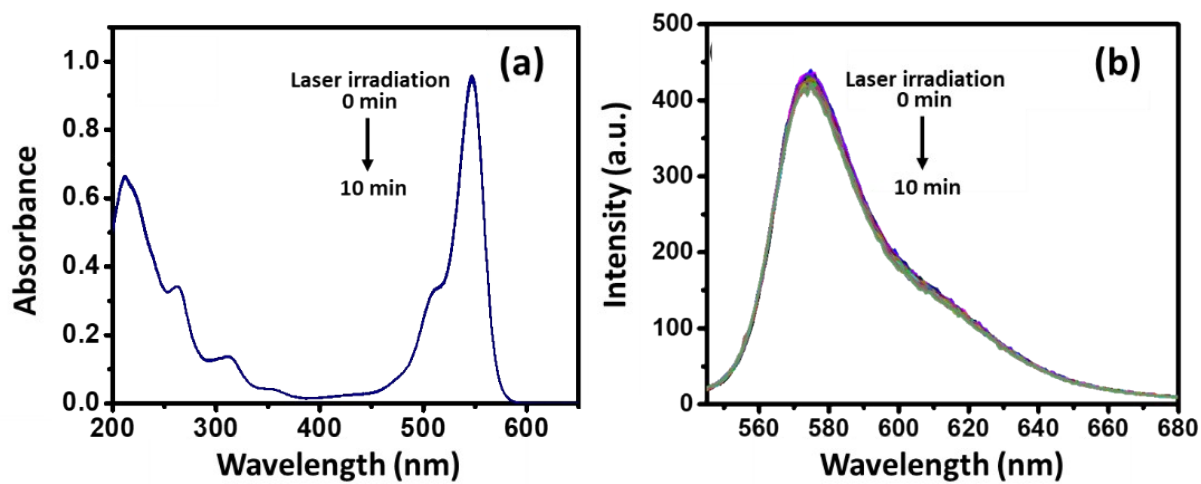

**Figure S4.** Effect of laser light on RB **(a)** UV-visible absorption spectra and **(b)** fluorescence emission spectra (before and after 10 min laser irradiation).

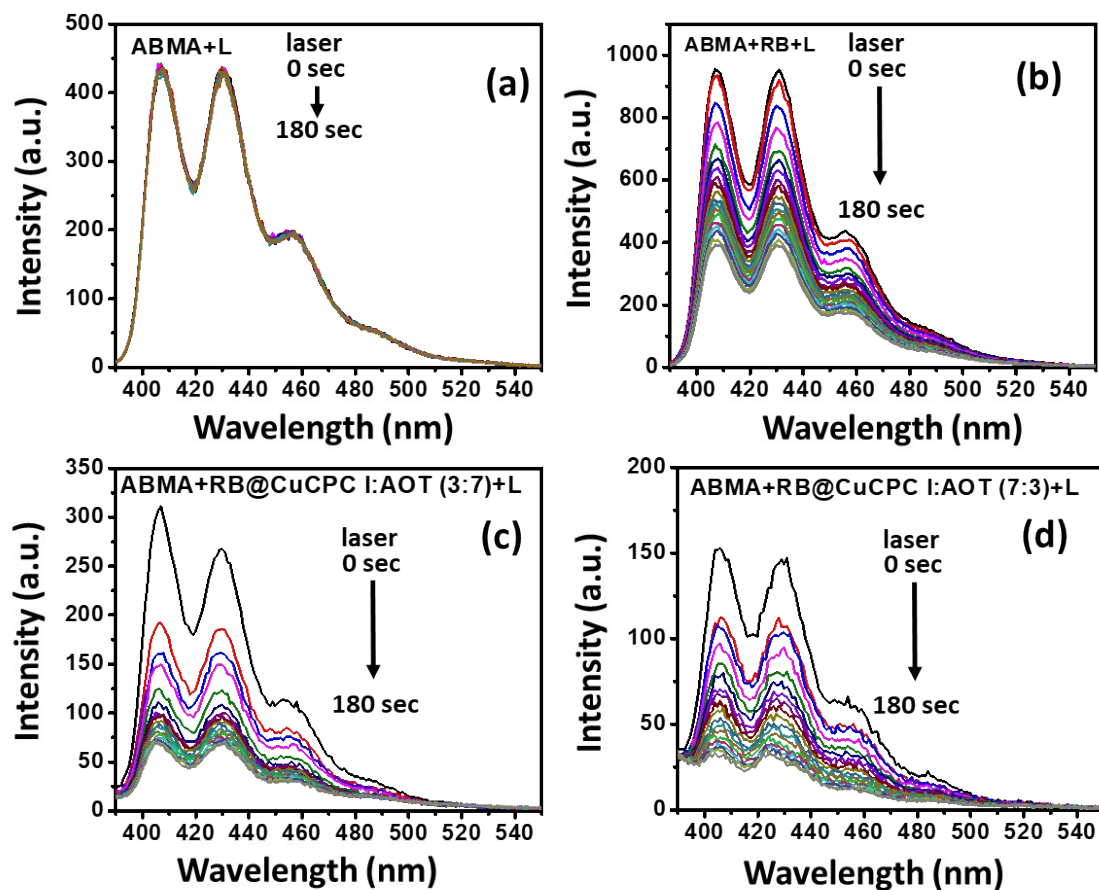

**Figure S5.** ABMA fluorescence emission intensity variation with (a) only laser light (L), (b) RB+L, (c) RB@CuCPC I:AOT(3:7)+L, (d) RB@CuCPC I:AOT(7:3)+L,

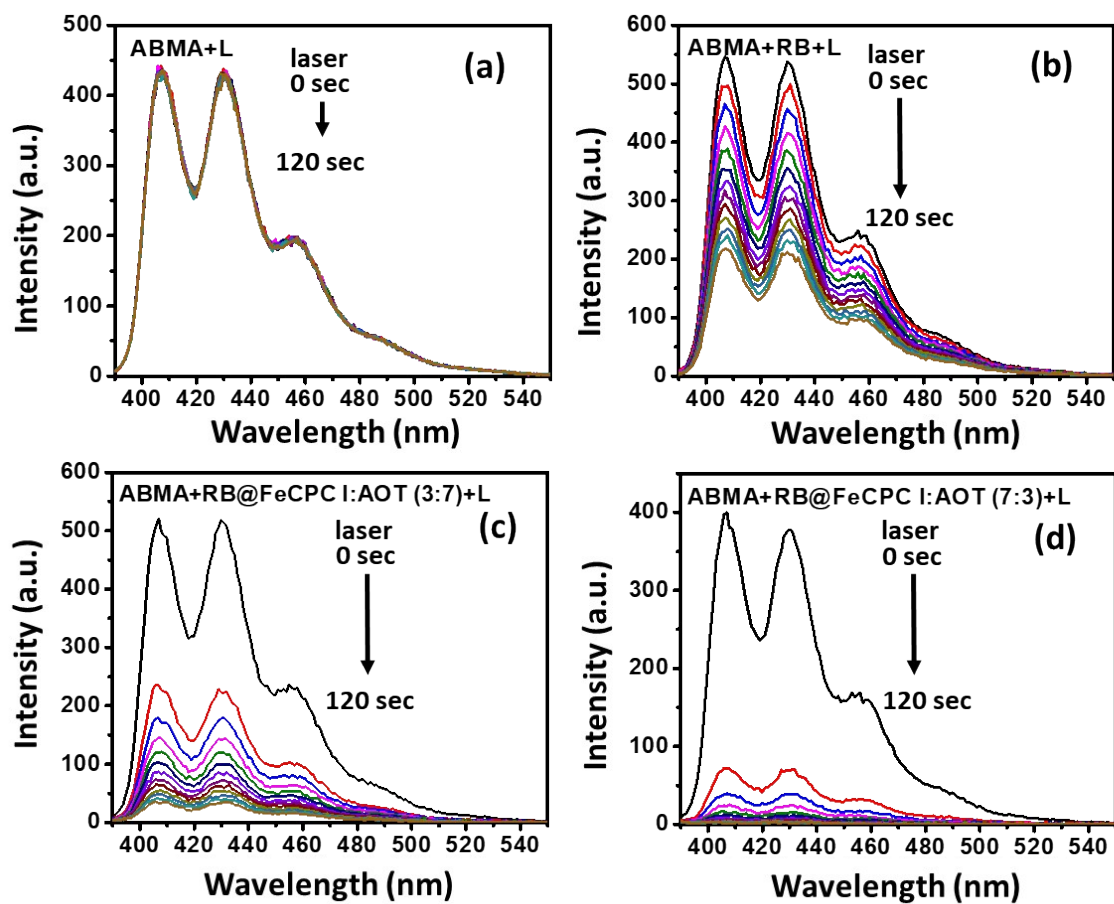

**Figure S6.** ABMA fluorescence emission intensity variation with (a) only L, (b) RB+L, (c) RB@FeCPC I:AOT(3:7)+L, (d) RB@FeCPC I:AOT(7:3)+L,

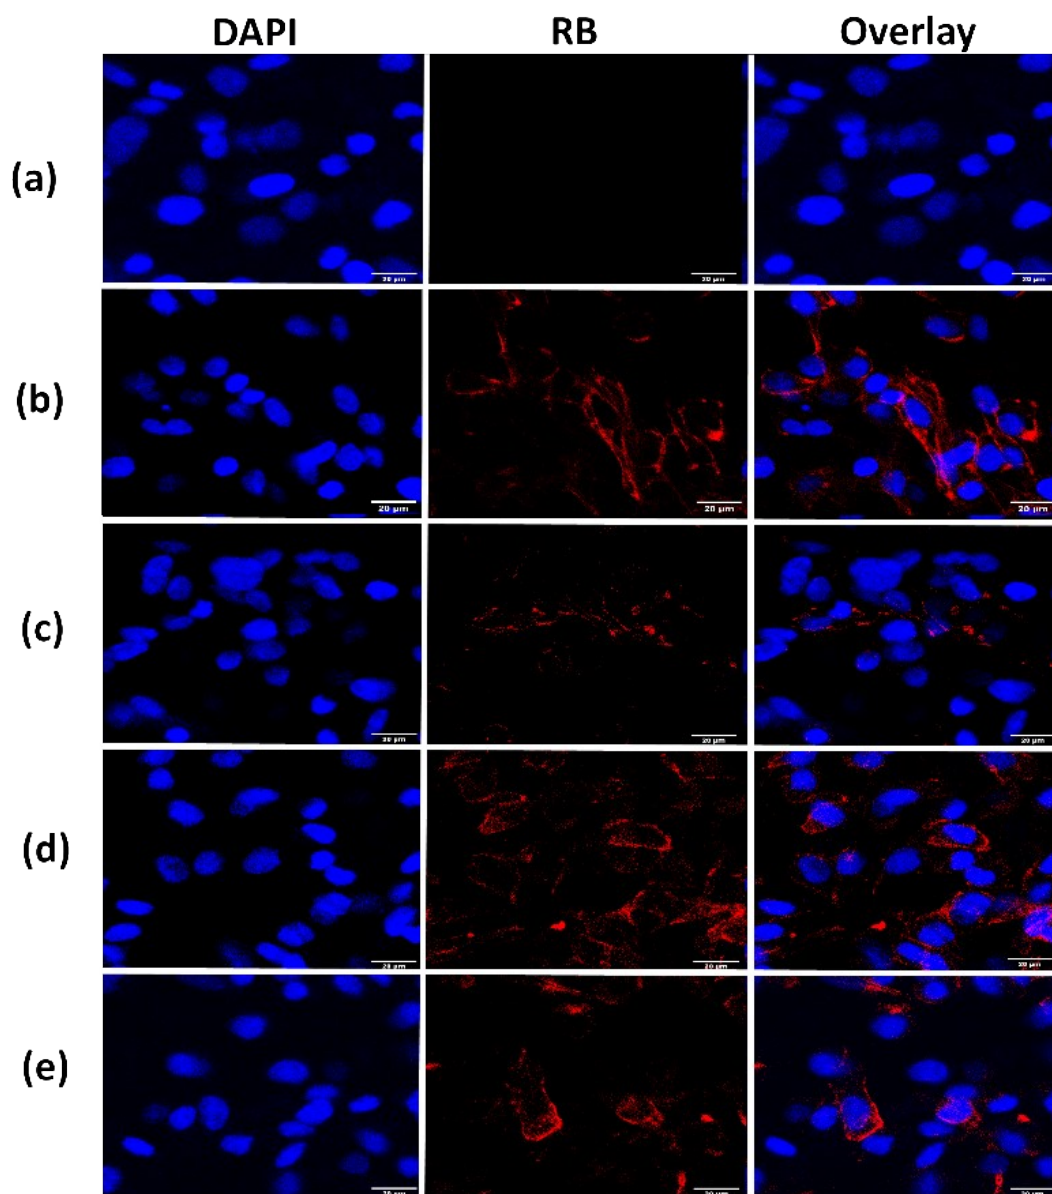

**Figure S7.** Confocal microscope images of U-251 cells cellular uptake study (a) control (where no RB present), (b) RB@CuCPC I:AOT(7:3), (c) RB@CuCPC I:AOT(3:7), (d) RB@FeCPC I:AOT(7:3) and (e) RB@FeCPC I:AOT(3:7) after 48 h incubation. DAPI(Blue) was used to stain nuclei (scale bar 20  $\mu\text{m}$ )
